# Supplementary material for: Cholinergic signals preserve haematopoietic stem cell quiescence during regenerative haematopoiesis
Source: PubMed Central journal article supplement (PMC8795384; doi:10.1038/s41467-022-28175-1), 2022-01-27
Supplement: 41467_2022_28175_MOESM1_ESM.pdf [file 41467_2022_28175_MOESM1_ESM.pdf]

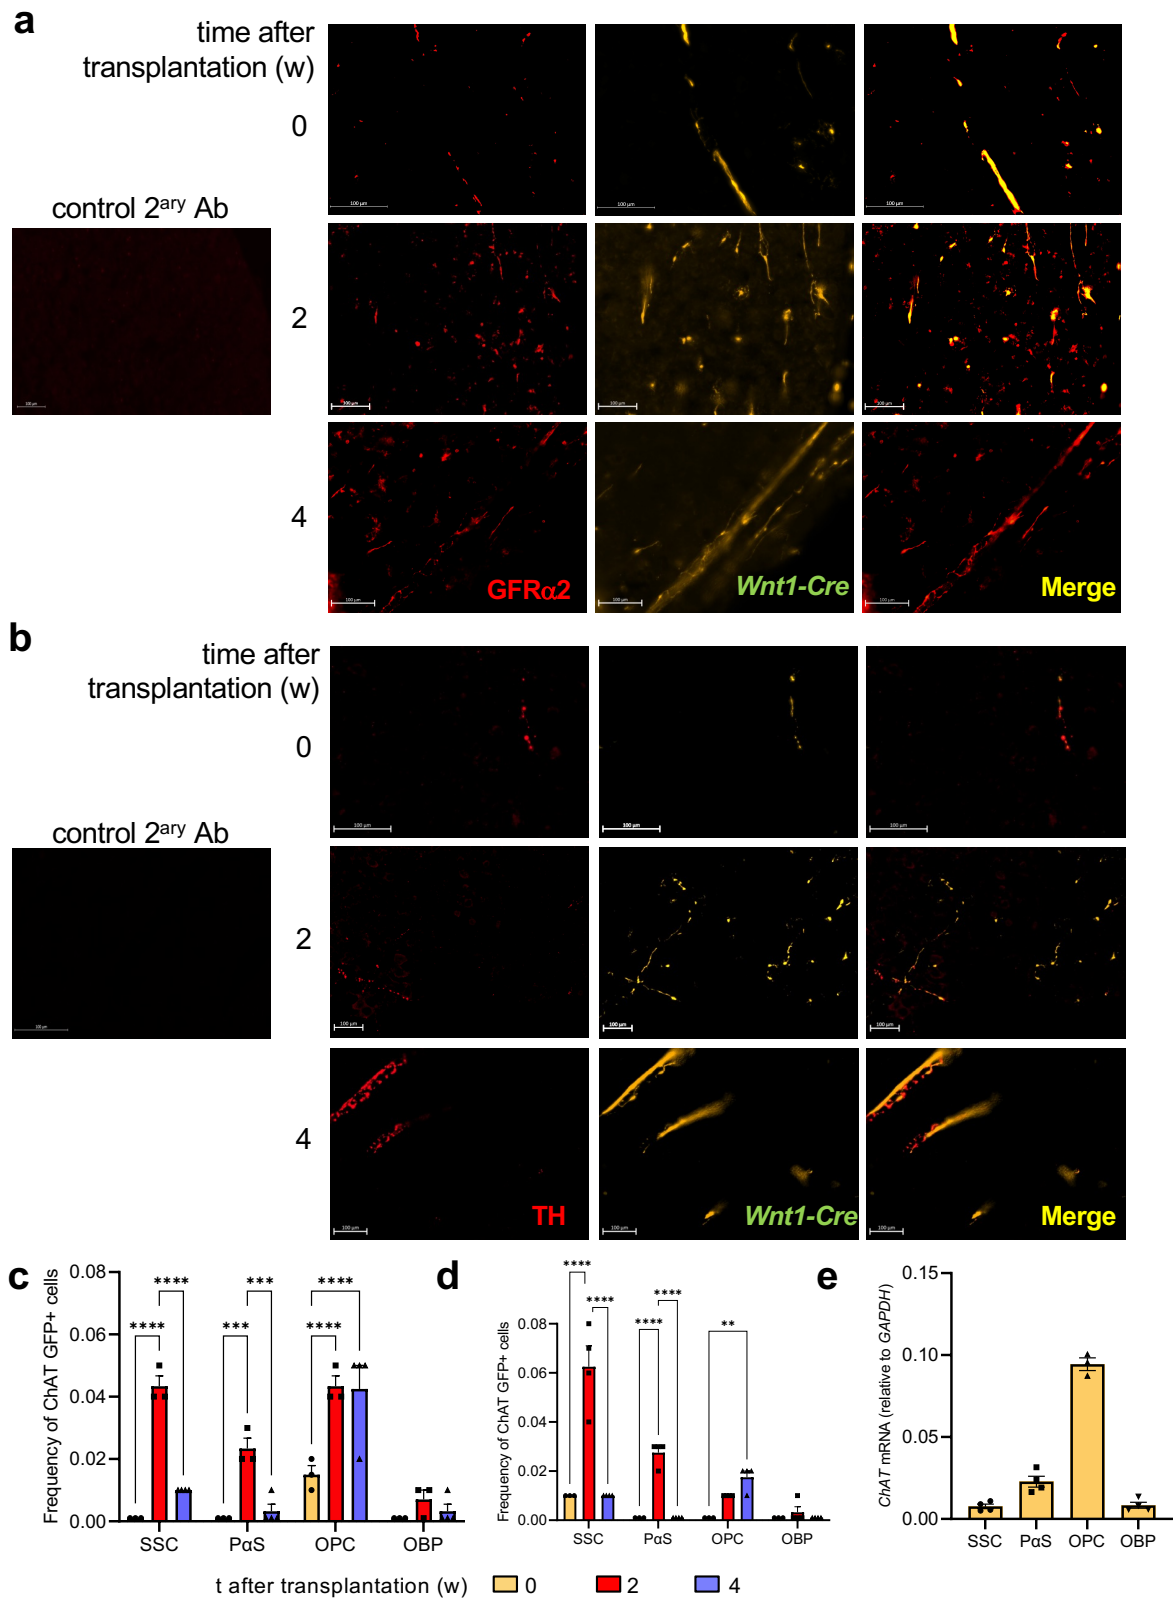

**Supplementary Figure 1, related to Figure 1. Increased cholinergic and reduced noradrenergic BM innervation after transplantation.** (a, b) Immunofluorescence (red) of (a) cholinergic (GFR $\alpha$ 2<sup>+</sup>; N=4,5,9) or (b) noradrenergic (tyrosine hydroxylase, TH<sup>+</sup>; N=4,8,6) nerve fibres genetically marked (green) in *Wnt1Cre2;Ai14D* mice before or 2-4w after transplantation. (c-d) Frequency of ChAT- GFP<sup>+</sup> cells among BM PDGFR $\alpha$ +Sca1<sup>-</sup> skeletal stem cells (SSC), PDGFR $\alpha$ +Sca1<sup>+</sup> (P $\alpha$ S) cells, PDGFR $\alpha$ -CD51+Sca1<sup>+</sup> bone-lining osteoprogenitors (OPCs) or PDGFR $\alpha$ -CD51+Sca1<sup>-</sup> osteoblast precursors (OBPs) genetically traced in the endosteal (c) and central (d) BM of *ChAT-Gfp* mice (N=3-4). (e) mRNA expression of *ChAT* in sorted osteolineage cells of WT mice (N=4). (c-e) Data are mean of biological replicates  $\pm$  SEM. \*\*p<0.01, \*\*\*p<0.001. ANOVA and Tukey's multiple comparisons test.

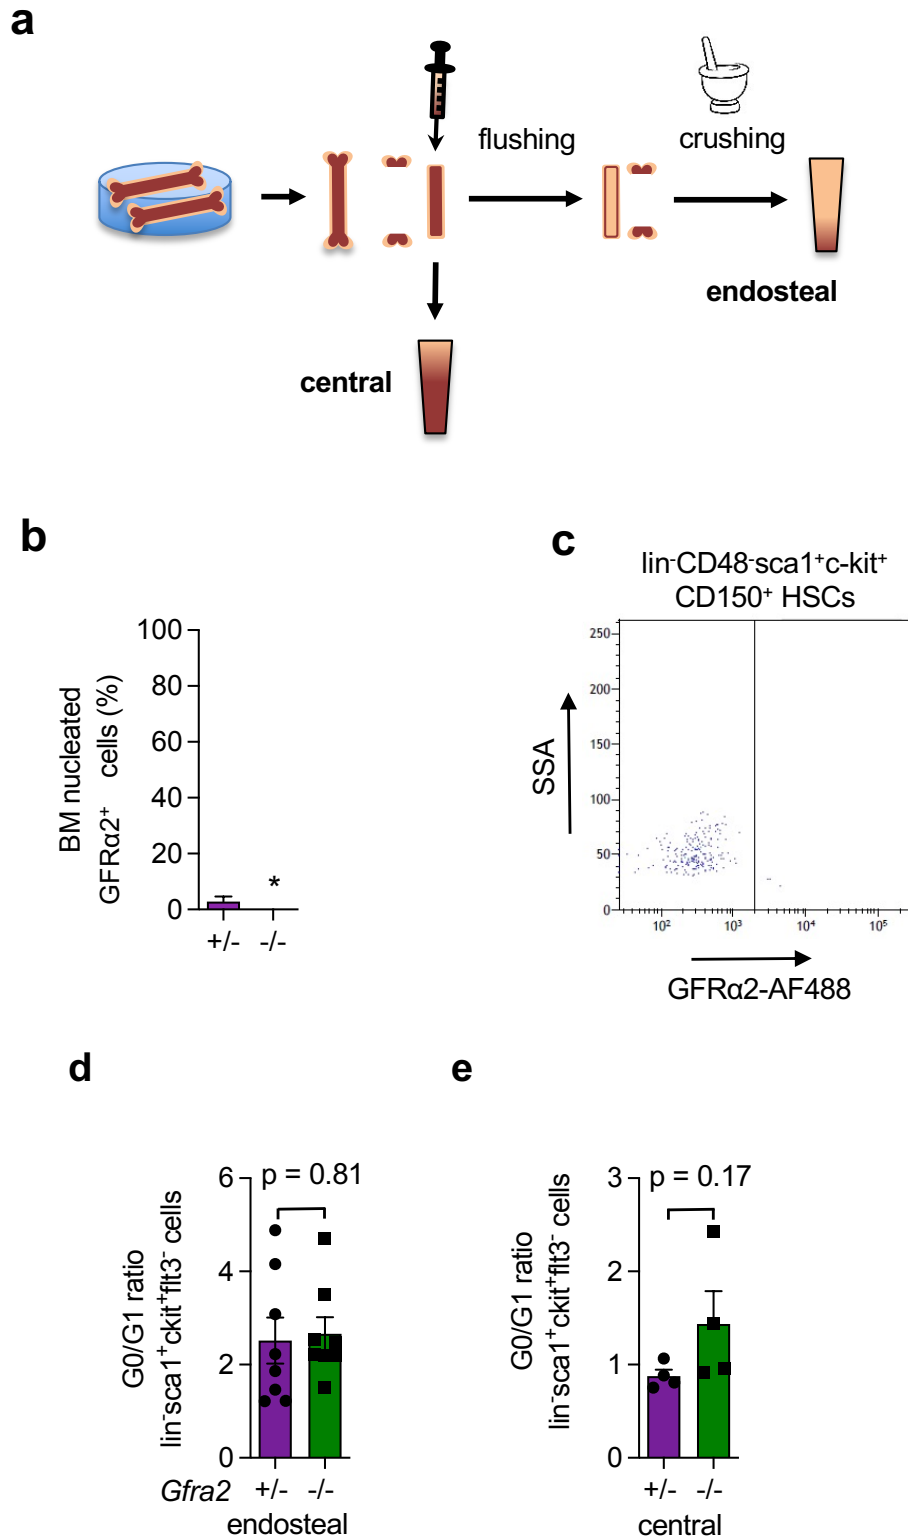

**Supplementary Figure 2, related to Figure 2. Non-cell-autonomous HSC regulation by GFR $\alpha$ 2.** (a) Scheme showing the protocol to enrich for endosteal and central BM fractions. (b) Frequency of BM nucleated cells labelled with anti-GFR $\alpha$ 2 antibody by flow cytometry in *Gfra2*<sup>+/-</sup> mice and *Gfra2*<sup>-/-</sup> mice ( $N=4$ ;  $P=0.02$ ). (c) Representative flow cytometry plot showing lack of GFR $\alpha$ 2 in *lin*<sup>-</sup>*sca1*<sup>+</sup>*c-kit*<sup>+</sup> (LSK) CD48<sup>-</sup> CD150<sup>+</sup> HSCs. (d-e) Transplantation into WT mice reverts the decreased endosteal HSC quiescence observed in donor *Gfra2*<sup>-/-</sup> mice. Ratio of the frequencies of LSK *flt3*<sup>-</sup> HSCs in the G0 or G1 phases of the cell cycle (LSK) isolated from the endosteal (d,  $N=8$ ) or central (e,  $N=4$ ) BM of WT mice 16w after lethal irradiation and transplantation into WT mice. Data are mean of biological replicates  $\pm$  SEM. \* $P < 0.05$ . Unpaired two-tailed  $t$  test.

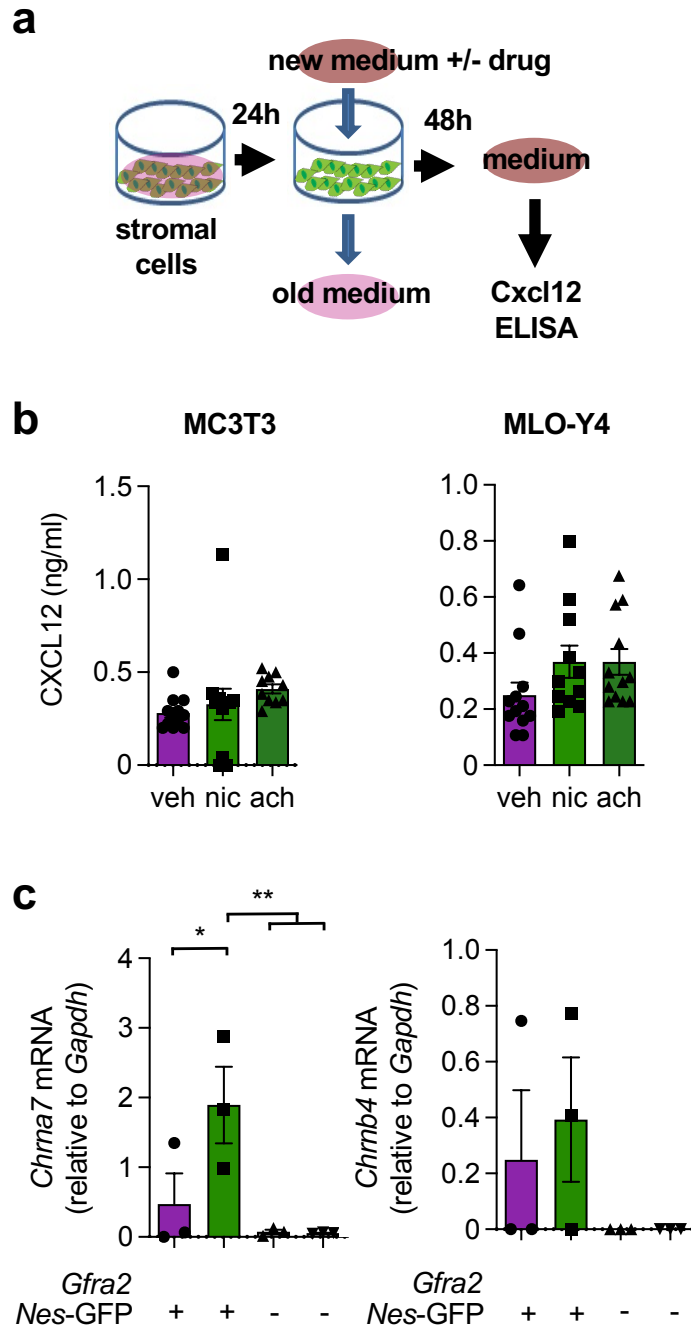

**Supplementary Figure 3, related to Figure 3. Cholinergic signalling regulates HSC function through the microenvironment.** (a) Experimental design used for cell culture and *Cxcl12* ELISA. (b) CXCL12 secretion by MC3T3-E1 ( $N=12,12,10$ ) and MLO-Y4 ( $N=12,11,12$ ) murine BM stromal cells treated with nicotine (nic), acetylcholine (ach) ( $10 \mu\text{M}$ ) or vehicle (veh) for 24h. (c) Expression of nicotinic receptors  $\alpha_7$  (*Chrna7*) and  $\beta_4$  (*Chrb4*) (Q-PCR) in sorted BM stromal (CD45-CD31-Ter119-) *Nes-GFP*<sup>±</sup> cells ( $N=3$ ). (b,c) Data are mean of biological replicates  $\pm$  SEM. One-way ANOVA and Bonferroni comparisons. \* $P < 0.05$ ; \*\* $P < 0.01$ .

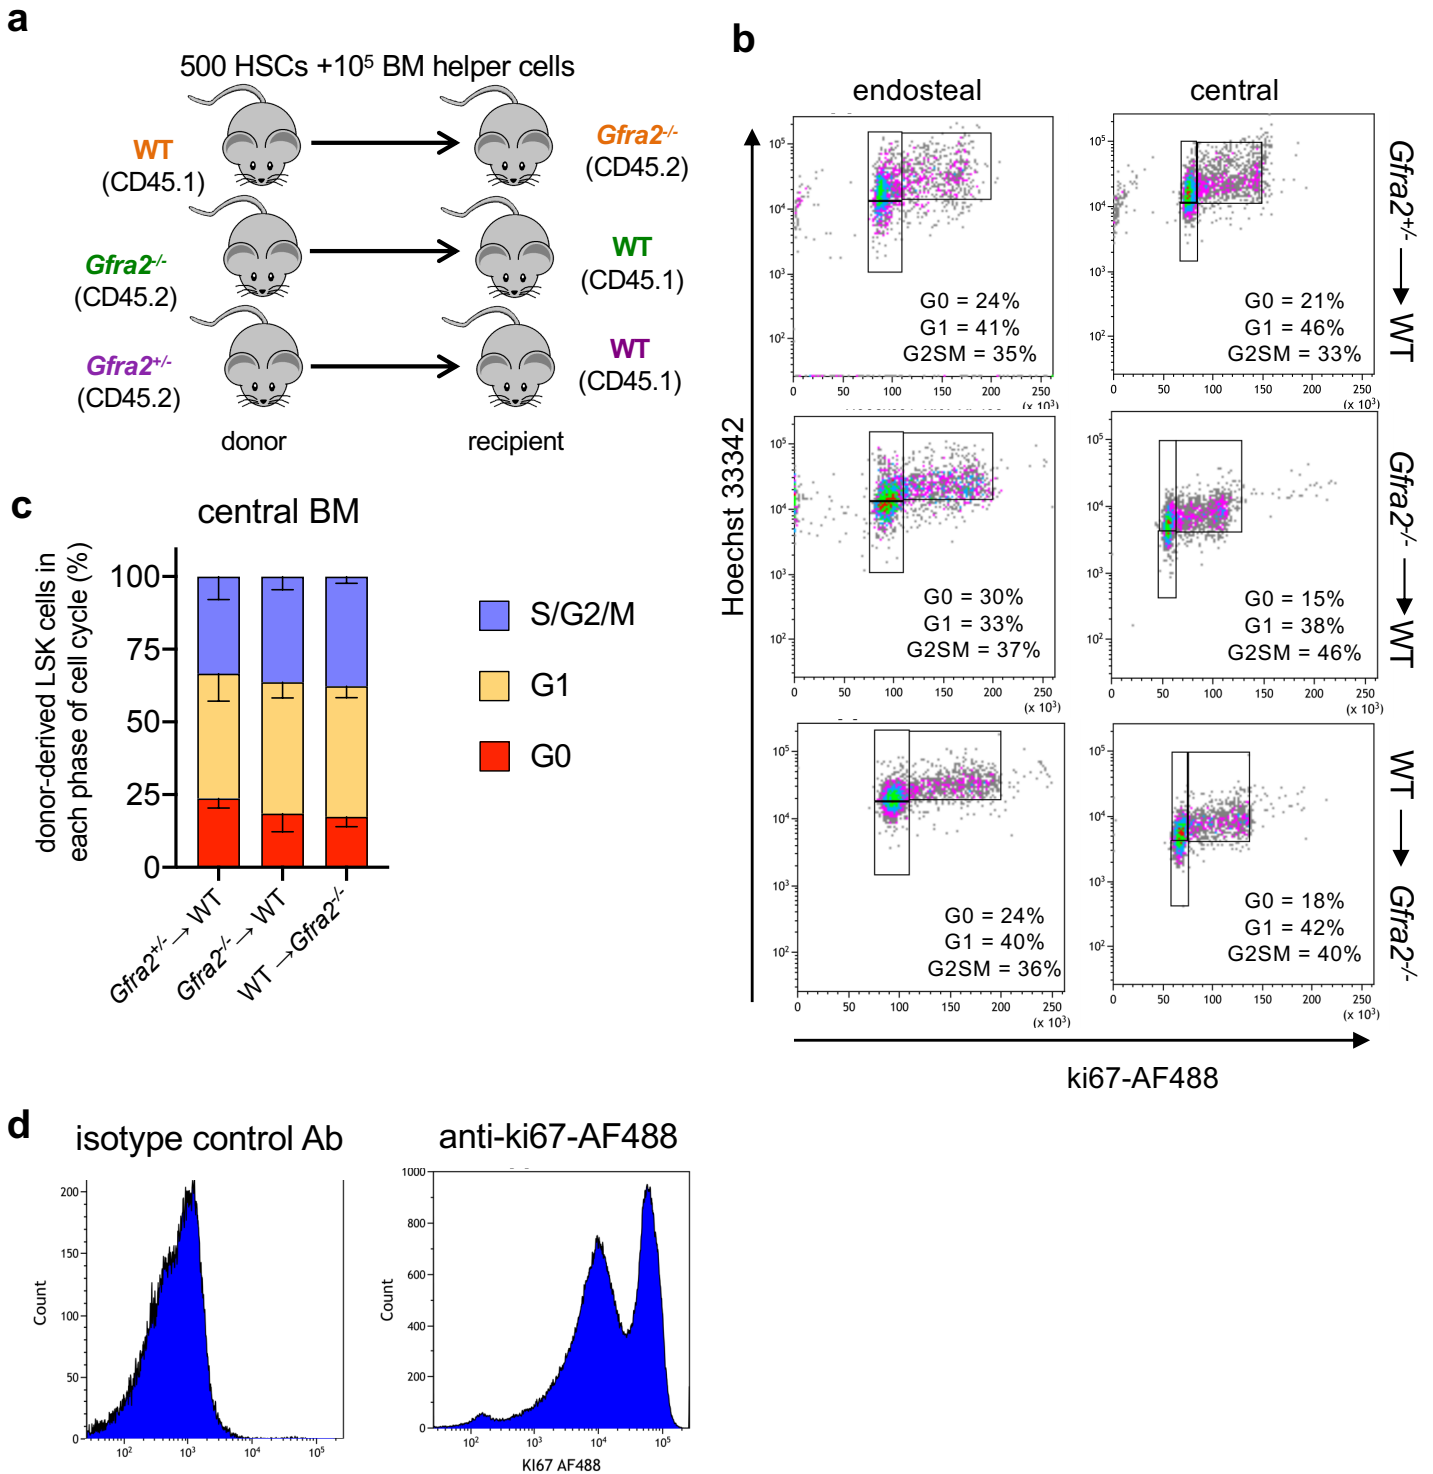

**Supplementary Figure 4, related to Figures 3 and 4. Cholinergic-deficient niche renders endosteal HSCs more proliferative.** (a) Scheme illustrating experimental design of long-term transplantation of 500 endosteal *lin*<sup>+</sup>*sca1*<sup>+</sup>*ckit*<sup>+</sup> (LSK) CD150<sup>+</sup>CD48<sup>-</sup> HSCs along with 10<sup>5</sup> BM helper cells into lethally-irradiated mice of indicated genotype. (b,c) Representative flow cytometry diagrams (b) and cell cycle analysis of central BM LSK cells 4 weeks after transplantation (*Gfra2*<sup>+/-</sup> → WT, N=3; *Gfra2*<sup>-/-</sup> → WT, N=3; WT → *Gfra2*<sup>-/-</sup>, N=4). ANOVA and Tukey's multiple comparisons test. (d) Representative histograms displaying isotype control antibody (Ab) and ki67 stainings.

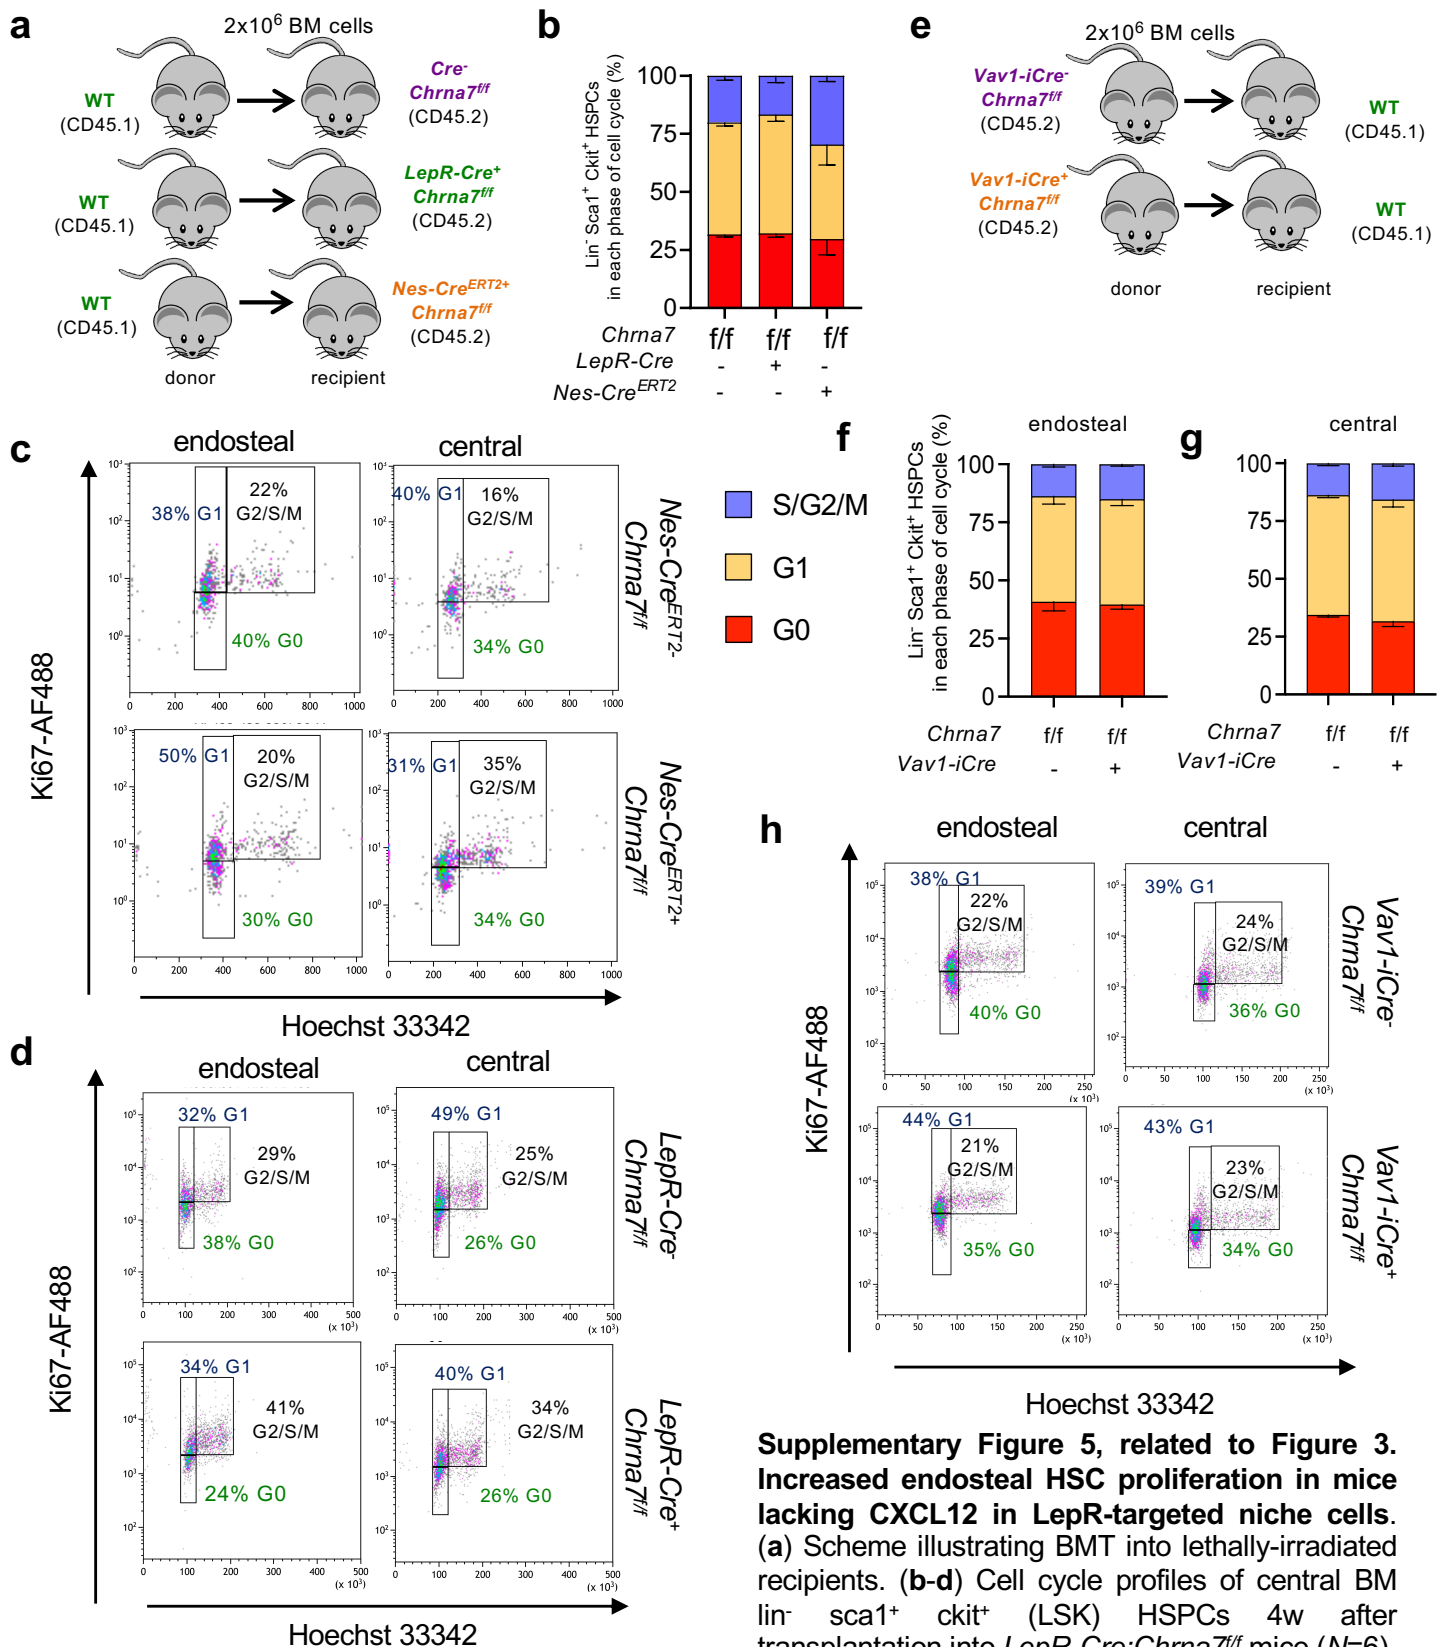

**Supplementary Figure 5, related to Figure 3. Increased endosteal HSC proliferation in mice lacking CXCL12 in *LepR*-targeted niche cells.** (a) Scheme illustrating BMT into lethally-irradiated recipients. (b-d) Cell cycle profiles of central BM  $lin^{-} sca1^{+} ckit^{+}$  (LSK) HSPCs 4w after transplantation into *LepR-Cre; Chrna7<sup>fl/fl</sup>* mice ( $N=6$ ), *Nes-Cre<sup>ERT2</sup>; Chrna7<sup>fl/fl</sup>* mice ( $N=3$ ) or control littermates ( $N=10$  pooled from two independent experiments). (c,d) Representative flow cytometry diagrams showing ki67/Hoechst 33342 staining of endosteal or central BM HSPCs. The frequencies of the gated populations are indicated (e) Scheme illustrating BMT into lethally-irradiated recipients. (f,g) Cell cycle profiles of (f) endosteal and (g) central BM  $lin^{-} sca1^{+} ckit^{+}$  (LSK) HSPCs 4w after transplantation of *Vav1-iCre; Chrna7<sup>fl/fl</sup>* mice or control littermates into lethally-irradiated WT CD45.1 mice ( $N=3$ ). (h) Representative flow cytometry diagrams showing ki67/Hoechst 33342 staining of endosteal or central BM HSPCs. The frequencies of the gated populations are indicated. (b,f,g) Data are mean of biological replicates  $\pm$  SEM. ANOVA and Tukey's multiple comparisons test.

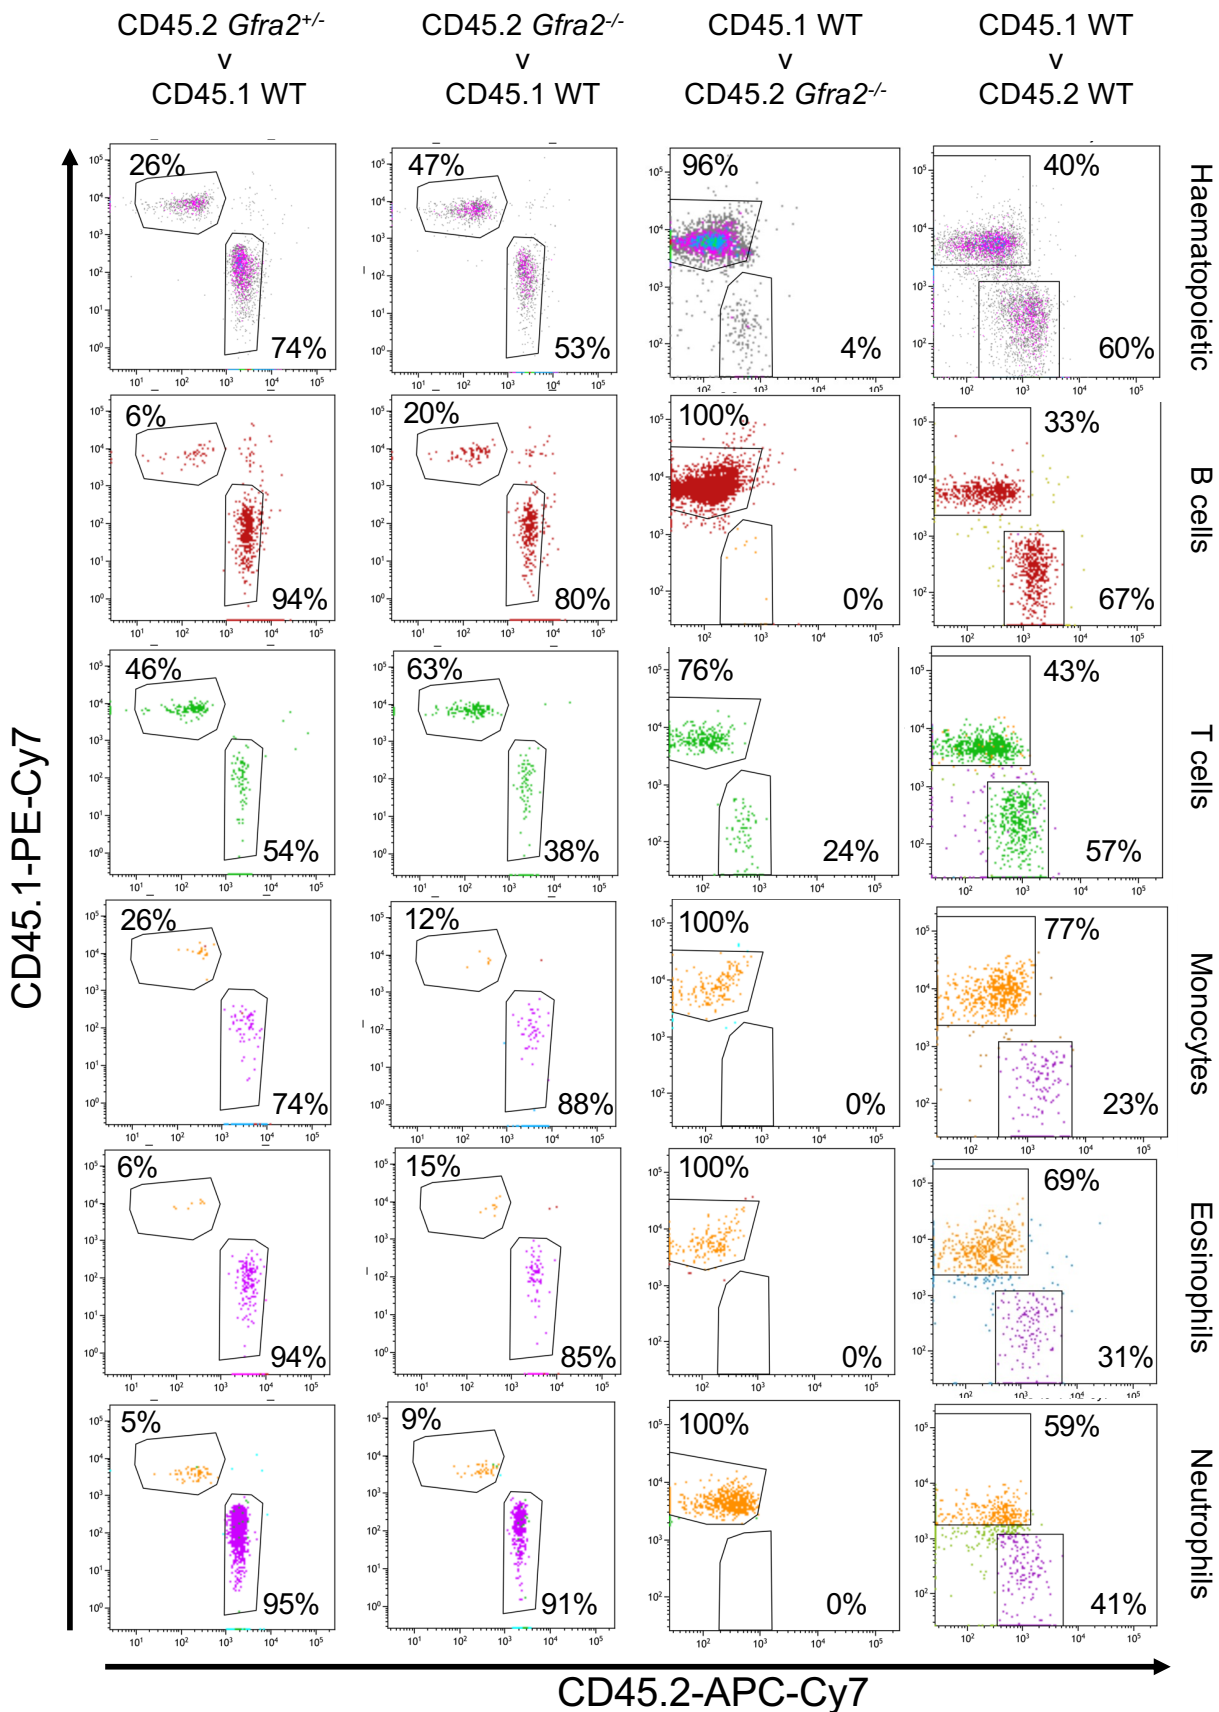

**Supplementary Figure 6, related to Figure 4. Cholinergic-deficient niche compromises HSC quiescence, leading to increased reconstitution of primary recipients.** Long-term transplantation of 500 endosteal *lin<sup>-</sup>sca1<sup>+</sup>ckit<sup>+</sup>* (LSK) CD150<sup>+</sup>CD48<sup>-</sup> HSCs along with 10<sup>5</sup> BM helper cells into lethally-irradiated mice of indicated genotype (see scheme in Fig. 4a). Representative flow cytometry diagrams of multilineage haematopoietic chimerism 4 months after primary transplantation (*Gfra2*<sup>+/-</sup>>CD45.1, N=5; *Gfra2*<sup>-/-</sup>>CD45.1, N=6; CD45.1>*Gfra2*<sup>-/-</sup>, N=4; CD45.1>*Gfra2*<sup>+/+</sup>, N=4).

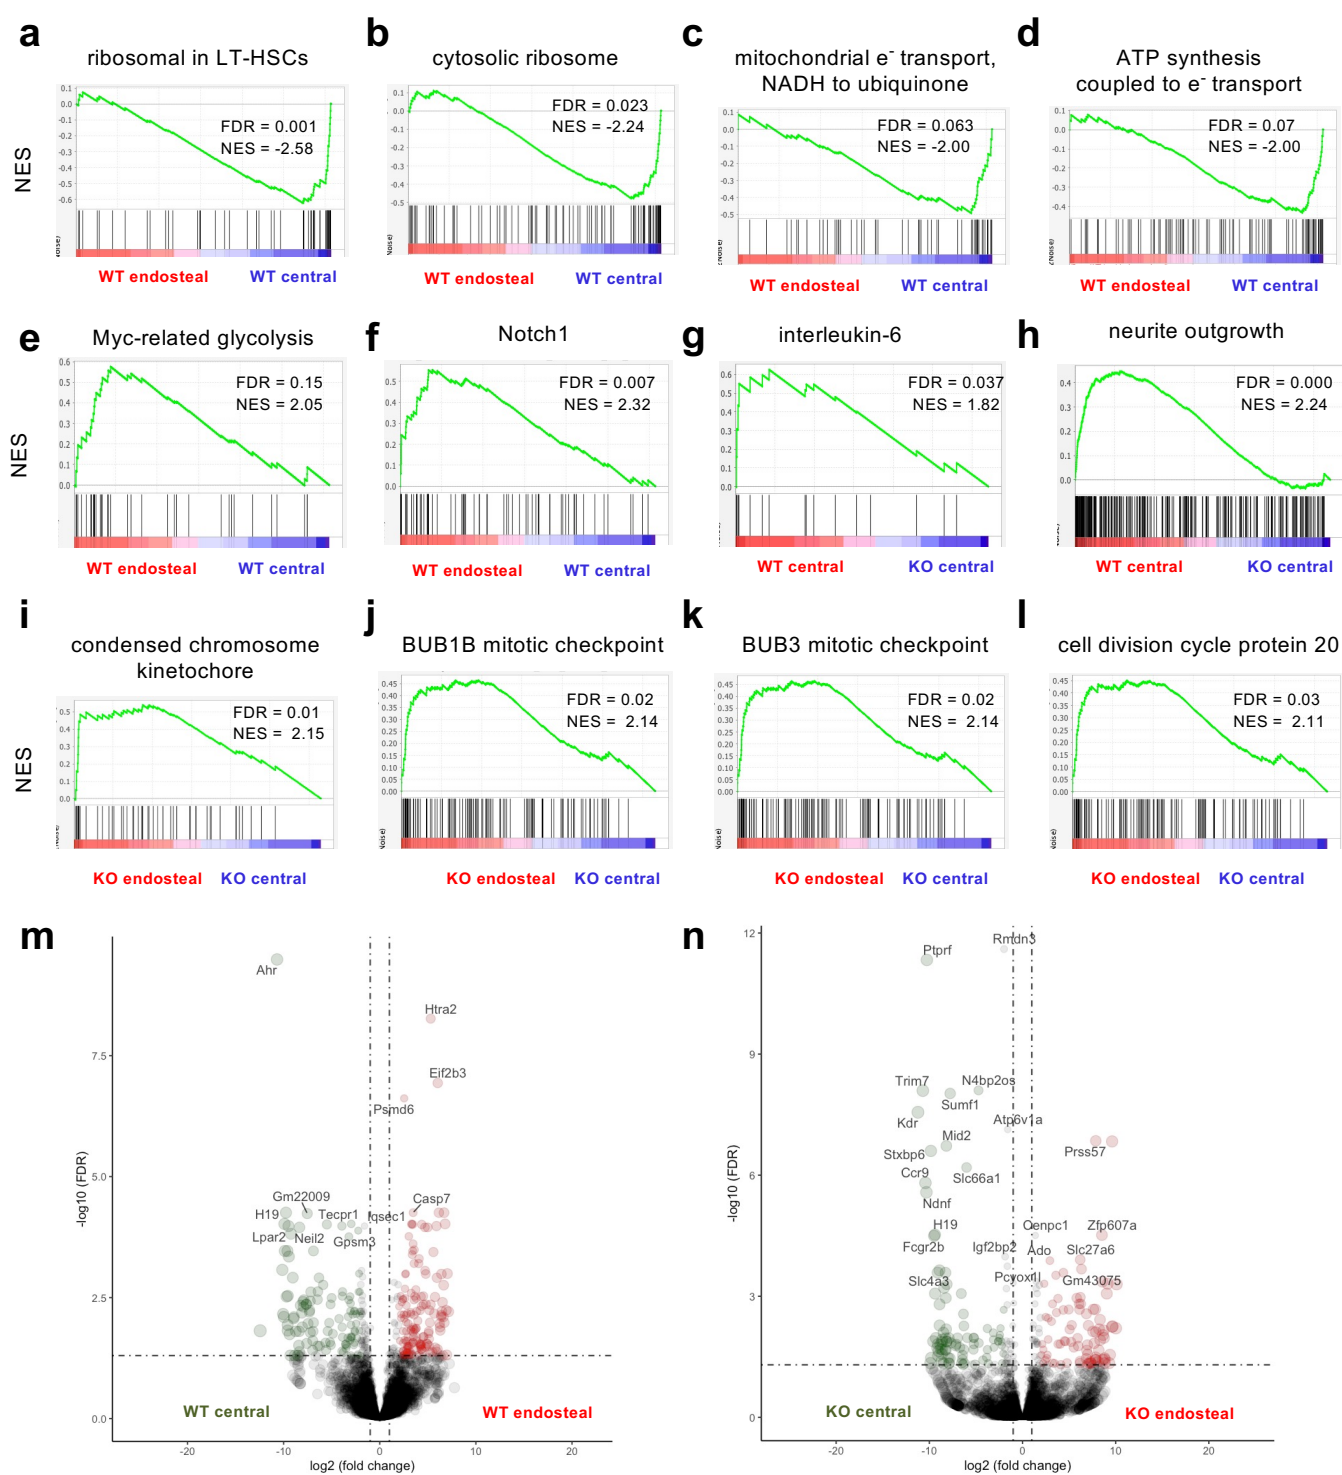

**Supplementary Figure 7, related to Figure 5. Increased proliferation and deregulated neural-related pathways in HSCs from cholinergic-neural-deficient mice.** Geneset enrichment analysis (GSEA) comparing endosteal and central BM HSCs of WT mice and *Gfra2*<sup>-/-</sup> mice (*N*=4 biological replicates). (a-f) Central (compared with endosteal) BM WT HSCs show increased ribosomal<sup>74</sup> (a,b) and mitochondrial respiration-related (c,d) pathways (GO), but reduced myc-related glycolysis and Notch1-associated pathways (e,f). (g,h) Reduced and IL6-dependent transcription<sup>75</sup> (g) and neurite outgrowth-related pathways (Biocarta) (h) in HSCs from *Gfra2*<sup>-/-</sup> mice. (i-l) Abnormal upregulation of gene sets associated with cell cycle progression and mitosis (GO and Reactome) in HSCs from endosteal *Gfra2*<sup>-/-</sup> BM. NES, normalized enrichment score; FDR, false discovery rate. (m,n) Volcano plots of differentially expressed genes in HSCs from the central or endosteal BM of (m) WT and (n) *Gfra2*<sup>-/-</sup> mice.

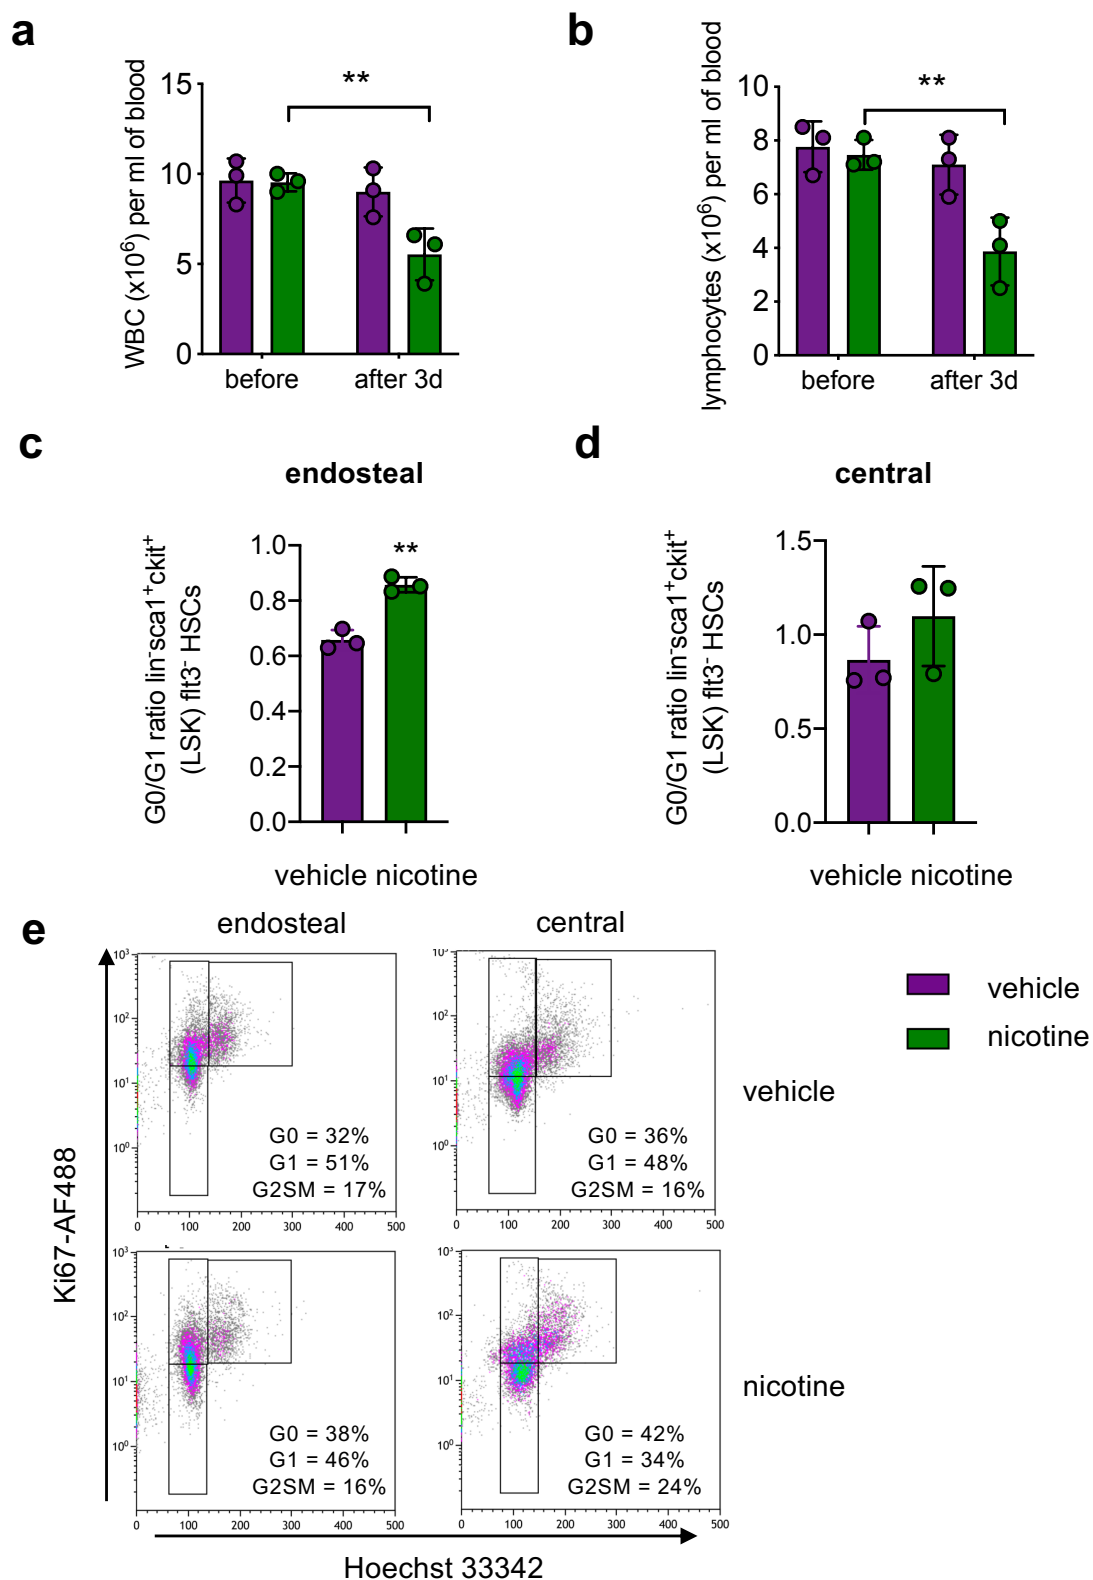

**Supplementary Figure 8, related to Figure 7. Nicotine induces endosteal HSC quiescence.** (a,b) White blood cells (WBC) (a) and circulating lymphocytes (b) in WT mice before (day 0) and 3 days after feeding mice with 1.5% saccharin in drinking water with/without 100µg/ml nicotine ( $N=3$ ). ANOVA and Sidak's comparisons. (c,d) Ratio of quiescent HSCs (G0:G1 phases of the cell cycle) in the (c) endosteal or (d) central BM of WT mice treated with nicotine (100µg per ml of drinking water) over 3 days ( $N=3$ ). Unpaired two-tailed  $t$  test. Each dot is a mouse. (a-d) Data are mean of biological replicates  $\pm$  SEM. (e) Representative flow cytometry diagrams showing ki67/Hoechst 33342 staining in endosteal or central BM HSCs from WT mice treated with nicotine or vehicle. The frequencies of the gated populations are indicated.



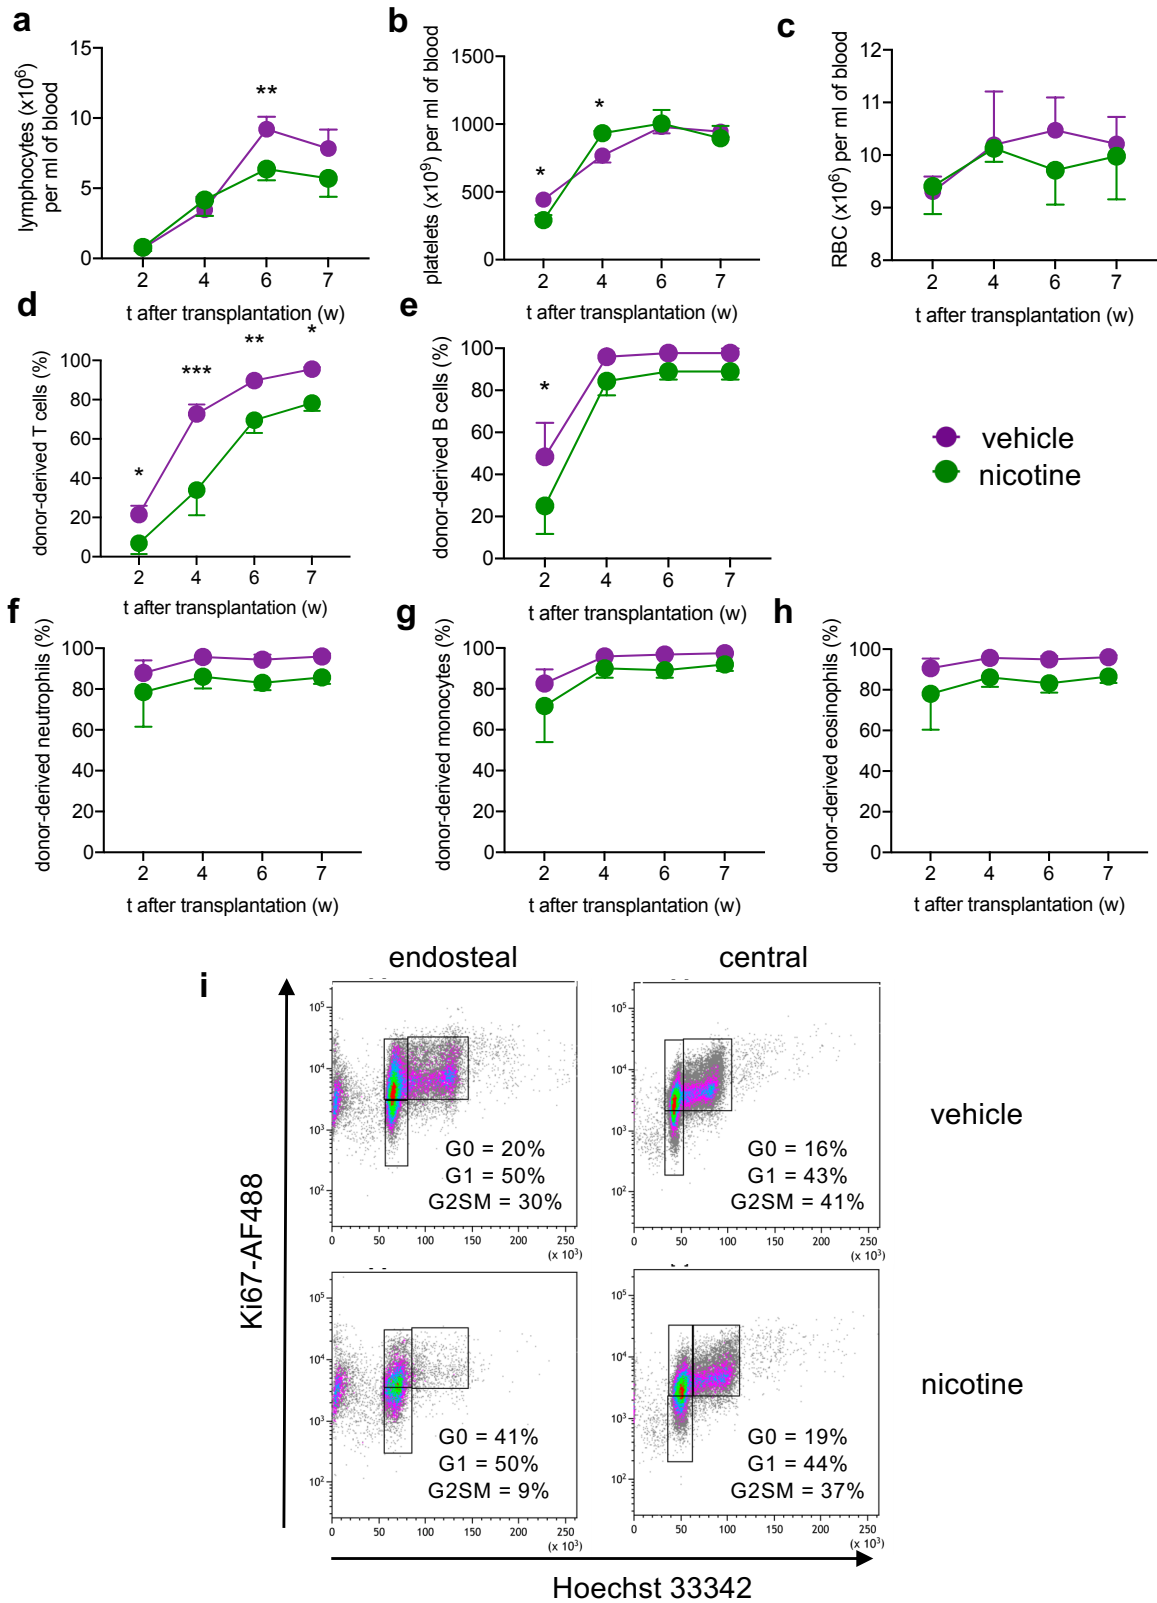

**Supplementary Figure 9, related to Figure 7. Nicotine treatment induces HSC quiescence under stress.** Sub-lethally irradiated WT CD45.2 recipients were transplanted with  $2 \times 10^6$  BM nucleated cells from CD45.1 mice and treated with 65  $\mu$ g/ml nicotine in their drinking water over 7 weeks. (a-h) Circulating lymphocytes (a), platelet (PLT) (b) and red blood count (c). Donor derived chimerism of T cells (d), B cells (e), neutrophils (f) monocytes (g), eosinophils (h) at specified time following transplantation ( $N=3$ ). Data are mean of biological replicates  $\pm$  SEM. \* $P < 0.05$ ; \*\* $P < 0.01$ ; \*\*\* $P < 0.001$ . ANOVA and Sidak's comparisons. (i) Representative flow cytometry plots showing cell cycle distribution, determined by ki67/Hoechst 33342 staining, of  $lin^- sca1^+ ckit^+ CD48^- CD34^- Flt3^-$  HSCs isolated from endosteal (bone) and central (marrow) BM fractions of nicotine treated or control mice 7w following transplantation. The frequencies of the gated populations are indicated.
