# Supplementary material for: Cholinergic signals preserve haematopoietic stem cell quiescence during regenerative haematopoiesis
Source: PubMed Central journal article supplement (PMC8795384; doi:10.1038/s41467-022-28175-1), 2022-01-27
Supplement: 41467_2022_28175_MOESM7_ESM.pdf [file 41467_2022_28175_MOESM7_ESM.pdf]

**Supplementary Data 4.** The sequence of oligonucleotides used for quantitative real-time RT-PCR.

| <b>Gene</b>   | <b>Forward</b>            | <b>Reverse</b>           |
|---------------|---------------------------|--------------------------|
| <i>Cxcl12</i> | CGCCAAGGTCGTCGCCG         | TTGGCTCTGGCGATGTGGC      |
| <i>Nrtn</i>   | CAGCGGAGGCGCGTGCGCAGAGA   | TAGCGGCTGTGCACGTCCAGGAA  |
| <i>ChAT</i>   | GCCAGTGGAAGAATCGTCAT      | TTGTGCATGTGAGTGTGTGG     |
| <i>Gfra2</i>  | TTTAACATGATCTTGGCAAACG    | AGCGGAGGGTTTCGTCTAA      |
| <i>Chrna3</i> | ACTCCAAAAGCTGCAAGGAA      | CAGAGCAGACAGGGACAACA     |
| <i>Chrna4</i> | GCAGGGTCTCACAGGAAGAG      | ACAGGATTTGGCTCCATCAC     |
| <i>Chrna5</i> | CGCTCTTCTTCCACACACAA      | TCTCGTGATGTAGCGAATGC     |
| <i>Chrna7</i> | TTGTGCTGCGATATCACCAC      | TTCATGCGCAGAAACCATGC     |
| <i>Chrn2</i>  | GGGAAGATTATCGCCTCACA      | GTGCAGTTCTGCTGGTCAA      |
| <i>Chrn4</i>  | GCTGAAGCTACGTCCACCTC      | GAAGCTGACGCCCTCTAATG     |
| <i>Chrm1</i>  | CAGAAGTGGTGATCAAGATGCCTAT | GAGCTTTTGGGAGGCTGCTT     |
| <i>Chrm2</i>  | TGGAGCACAACAAGATCCAGAAT   | CCCCTGAACGCAGTTTTCA      |
| <i>Chrm3</i>  | CCGCTCTACCTCTGTCCTTCA     | GGTGATCTGACTTCTGGTCTTGAG |
| <i>Chrm4</i>  | GTGACTGCCATCGAGATCGTAC    | CAAACTTTCGGGCCACATTG     |
| <i>Chrm5</i>  | GGCCAGAGAGAACGGAAC        | TTCCCGTTGTTGAGGTGCTT     |
| <i>Gapdh</i>  | TGTGTCCGTCGTGGATCTGA      | CCTGCTTCACCACCTTCTTGA    |
